## Prognosis of patients with left circumflex artery acute myocardial infarction in relation to ST-segment on admission electrocardiogram

Kobo O.<sup>1</sup>; Marcusohn E.<sup>2</sup>; Roguin A.<sup>1</sup>; Zukermann R.<sup>2</sup>; Amsalem N.<sup>1</sup>; Nikolsky E.<sup>2</sup>; Meisel SR.<sup>1</sup>

<sup>1</sup>Hillel Yaffe Medical Center, Hadera, Israel

<sup>2</sup>Rambam Health Care Campus, Haifa, Israel

**Funding Acknowledgements:** Type of funding sources: None.

**Background.** Total thrombotic occlusion of the LCX may present without ST-segment elevations.

**Objective.** To examine the difference in clinical outcomes between patients with acute MI due to LCX occlusion or stenosis with and without ST-segment elevation.

**Methods.** The present study is a dual center, observational, retrospective cohort study comprising all patients admitted to between 2009 and 2019 with LCX-related.

**Results.** A total of 897 patients with LCX-related MI were included. Most (56.6%) presented with NSTEMI, which was associated with higher rates of 1-year hospitalization for ACS (15.8% vs 11.1%;  $P=.05$ ) and PCI (20.9% vs 14.4%;  $P=.05$ ). STEMI was associated with higher 30-day mortality compared with NSTEMI (3.9% vs 1.7%,  $P=.05$ ), with no difference in 1-year mortality (6.7% vs 5.6%,  $P=.55$ ). Multivariate analysis found left dominant circulation (odds ratio [OR], 2.62; 95% confidence interval [CI], 1.4-4.7) and diabetes mellitus (OR, 2.13; 95% CI, 1.2-3.6) to be independent predictors of 1-year mortality.

**Conclusion.** Patients suffering from NSTEMI and STEMI related to LCX occlusion or stenosis have similar 1-year mortality. Left dominance was associated with higher short- and long-term mortality. These results suggest that a substantial population of patients who present as NSTEMI should be treated promptly and aggressively as STEMI patients.
